# Supplementary material for: Projectes educatius Ikertze
Source: Springer Nature journal article supplement (doi:10.1186/s12967-019-1878-3), 2005-01-01
Supplement: MOESM1 [file 16657484]

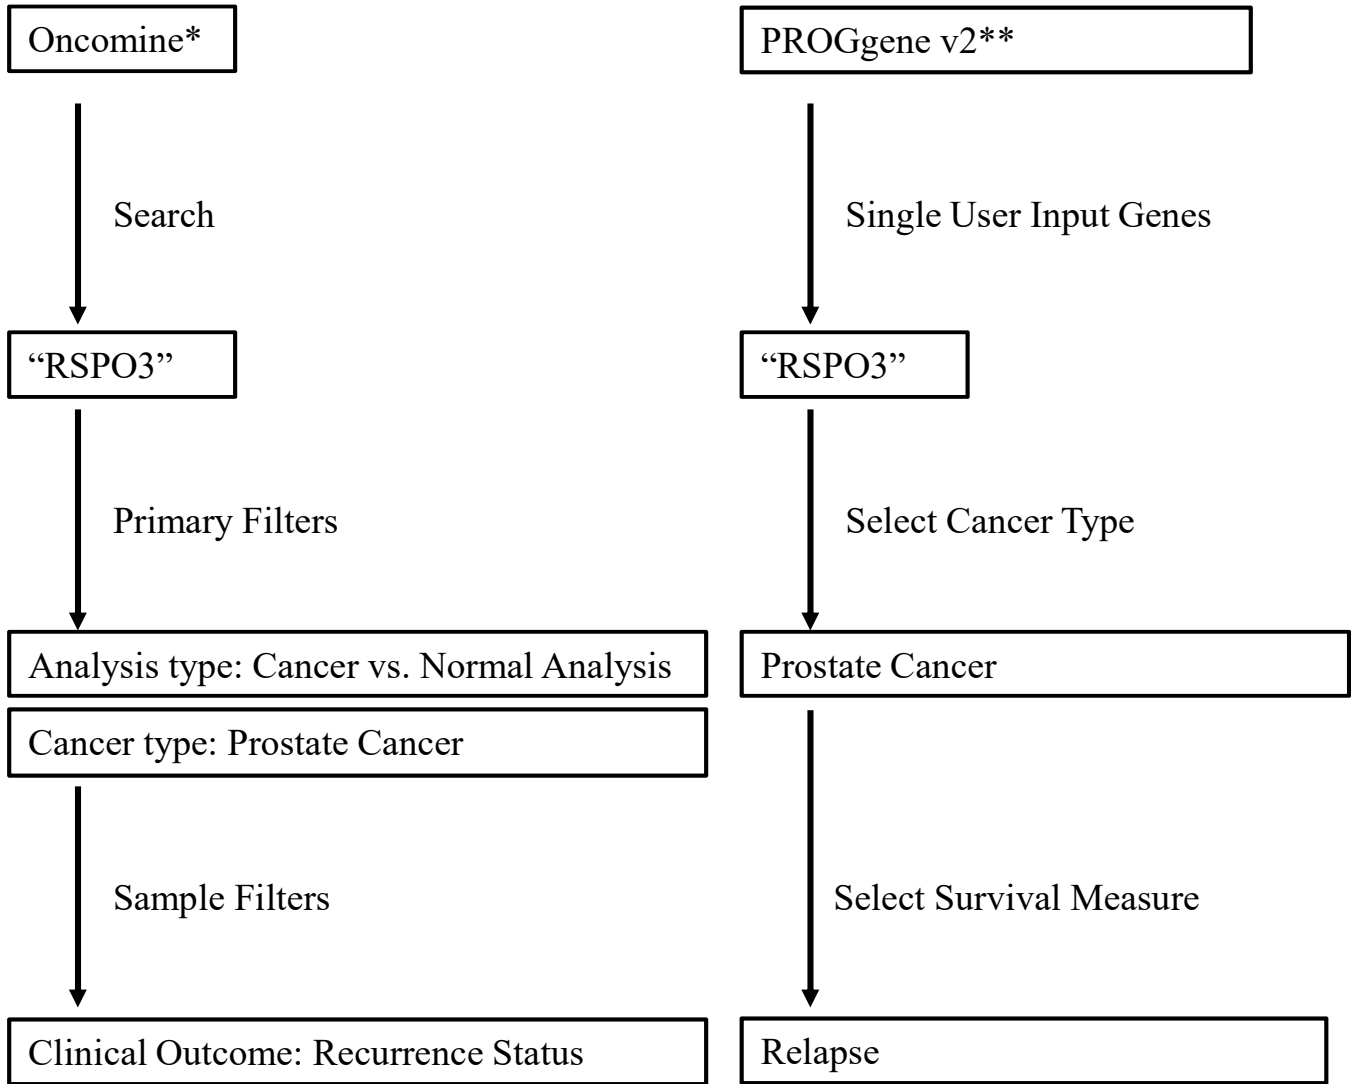

\*[www.oncoPrint.org](http://www.oncoPrint.org)

\*\*<http://watson.compbio.iupui.edu/chirayu/proggene/database/?url=proggene>

**Figure S1**

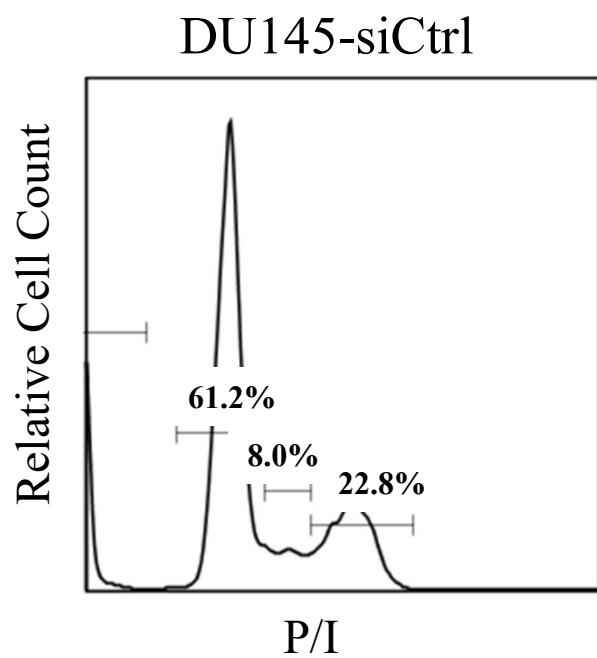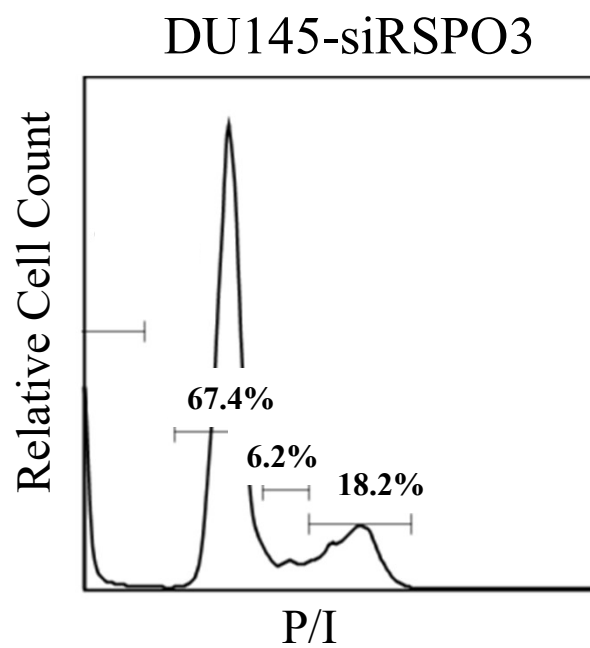

**Figure S2**
